# **Leave-one-out cross-validation and linear modeling of visuospatial memory to predict long-term motor skill retention in individuals with and without chronic stroke: A short report**

Jennapher Lingo VanGilder, M.S.<sup>1</sup>; Andrew Hooyman, Ph.D.<sup>1</sup>; Pamela R. Bosch, P.T., D.P.T., Ph.D.<sup>2</sup>; \*Sydney Y. Schaefer, Ph.D.<sup>1,3</sup>

<sup>1</sup>School of Biological and Health Systems Engineering, Arizona State University; <sup>2</sup>Department of Physical Therapy and Athletic Training, Northern Arizona University; <sup>3</sup>Department of Physical Therapy and Athletic Training, University of Utah

\*Corresponding Author: Sydney Y. Schaefer, Ph.D.

sydney.schaefer@asu.edu

(480) 727-6651

# **Abstract**

Motor learning is fundamental to motor rehabilitation outcomes and has been associated with visuospatial memory function in previous studies. Current predictive models of motor recovery of individuals with stroke generally exclude cognitive measures, overlooking the connection between motor learning and visuospatial memory. Recent work has demonstrated that a clinical test of visuospatial memory (Rey-Osterrieth Complex Figure Delayed Recall) may predict one-month skill learning in older adults, but if this relationship persists in individuals with chronic stroke remains unknown. The purpose of this short report was to extend these findings by evaluating the extent these test scores impacted prediction in older adults and determine if this relationship generalized to individuals with stroke pathology. To address these questions, we trained two regression models (one including Delayed Recall scores and one without) using data from non-stroke older adults. To determine the extent to which Delayed Recall test scores impacted prediction accuracy of one-month skill learning in older adults, we used leave-one-out cross-validation to evaluate the prediction error between models. To determine if this predictive relationship persisted in individuals with chronic ischemic stroke, we then tested each trained model on an independent stroke dataset. Results indicated that in both stroke and non-stroke datasets, inclusion of Delayed Recall scores explained significantly more variance of one-month skill performance than models that included age, education, and baseline motor performance alone. This proof-of-concept suggests that the relationship between delayed visuospatial memory and one-month motor skill performance generalizes to individuals with chronic stroke and supports the idea that visuospatial testing may provide prognostic insight into motor rehabilitation outcomes.

# **Keywords**

Model validation; motor learning; stroke rehabilitation; upper extremity

### **List of abbreviations**

ANOVA: analysis of variance; MSE: mean squared error

# Introduction

Motor learning processes are fundamental to clinical motor rehabilitation. In other words, the benefits of motor therapy are theoretically predicated upon an individual's capacity for skill reacquisition and long-term retention (1). Because the effects of stroke can vary greatly between individuals, responsiveness to motor therapy can be difficult to predict. There are already several models that have been developed to predict biological motor recovery post-stroke (e.g., the Predicting REcovery Potential algorithm (2)) that include personalized variables such as baseline motor function, age, severity of stroke, and white matter integrity. However, when attempting to predict changes in post-stroke upper-extremity impairment following therapy (i.e., responsiveness to motor therapy), recent work in machine learning has shown that the inclusion of sophisticated neuroimaging measures does not improve prediction accuracy beyond basic clinical measures (i.e., baseline Fugl-Meyer score) (3).

To our knowledge, no predictive models of therapeutic responsiveness include cognitive variables, despite growing evidence that they may explain significant amounts of variance in motor learning (4–6). For example, attention, executive function, and visuospatial memory underlie crucial stages of motor learning and are also among the most common cognitive deficits reported following stroke. Furthermore, a number of studies have shown that advancing age is associated with less improvement in motor therapy following stroke (7) and other musculoskeletal conditions. Since cognitive status often declines with age, it is plausible that responsiveness to motor therapy can, at least in part, be predicted by cognitive factors.

Empirically, there is a longstanding line of experimental motor learning studies that have shown that visuospatial function (i.e., of or relating to visual perception and spatial relationships between objects) is positively correlated with motor learning in both young and older adults (8–

12). Our more recent work has begun to bridge the gap between empirical and clinical studies by showing that neuropsychological tests of visuospatial function may predict upper-extremity motor learning following task-specific training in older cohorts that are age-matched to a number of clinical stroke samples (e.g., (13)), whereas other clinical tests of attention, language, memory, etc., do not (14,15). This line of work has also highlighted that not all visuospatial tests are created equal, so to speak, since different visuospatial tests such as the Benton Judgement of Line Orientation (16) and the Wechsler Adult Intelligence Scale Block Design (17) probe different aspects of visuospatial function. By systematically comparing a battery of clinical visuospatial tests (including memory, perception, problem-solving, reasoning, and construction), we have demonstrated that only the Rey-Osterrieth Complex Figure Delayed Recall test (18), which measures visuospatial memory, uniquely predicted long-term skill retention of task-specific training in older adults without a history of stroke (13). This work strongly supports the premise that the same assessment (i.e., Delayed Recall) may also be a predictor of motor learning after stroke.

Thus, the purpose of this short report was to determine if the previously observed relationship between Delayed Recall test scores and one-month post-training skill performance in older adults persisted in individuals with a history of stroke and to evaluate the extent these test scores impacted prediction accuracy. This hypothesis-driven approach generated predictive models from a training dataset and then tested the generalizability of these models to an untrained dataset to test whether models that included visuospatial memory tests scores resulted in better predictive accuracy than models that did not.

## **Methods**

All experimental procedures were approved by Arizona State University's Institutional Review Board and adhered to the Declaration of Helsinki. Forty-seven adults ages 56 to 87 years old (29 female/18 male) without a history of stroke comprised the training dataset, and seven adults with a history of ischemic stroke ages 33 to 81 (3 female/4 male) comprised the testing dataset. All participants provided informed consent prior study enrollment. A subset of data in the non-stroke cohort (n=45) has been published previously (13) and is included in the present study to model the predictive relationship described below. All participants were right-hand dominant (premorbidly if post-stroke), and were non-demented, based on established cut-off scores for neuropsychological assessments (see (13)). Participants with a history of ischemic stroke were also evaluated for motor deficits in their more-affected arm using the Upper Extremity Fugl-Meyer Assessment and the Action Research Arm Test. Post-stroke spasticity of the elbow flexors was evaluated using the Modified Ashworth Scale. Participants were excluded if they had hemispatial neglect, as determined by the Mesulam Cancellation Test. One participant had a right thalamic infarct, one had multifocal infarcts to the left middle cerebral artery related to high grade stenosis, one had a vertebral artery dissection, and one had a thrombotic ischemic stroke at the base of the cerebellum. Lesion location information was not available for three participants.

### *Rey-Osterrieth Complex Figure Delayed Recall*

This complex figure drawing test comprises two separate trials: A Figure Copy (measures visual construction) and a Delayed Recall (measures delayed visuospatial memory) trial. Participants were first asked to draw a replicate of a complex image as precisely as possible; once finished, all visual stimuli were removed from the testing area. Thirty minutes later, participants were asked to redraw the figure from memory (Fig. 1). To reduce interrater

variability, a single rater scored each test using established testing guidelines. It is of note that the Delayed Recall score is independent of the Copy trial score (i.e., a high score on the Copy trial does not indicate the participant will achieve similar performance on the delayed memory trial). Based on our previous work using principal component analysis (13), only the Delayed Recall test scores were evaluated in this short report.

### *Task-specific motor training*

Task-specific training included three sessions of 50 practice trials of a functional upper-extremity motor task over three consecutive weeks (one session/week). More details regarding the motor task are provided below. Participants were then re-tested one month after training to evaluate the amount of motor skill retained following a period of no practice; thus, our paradigm was designed with key principles of motor learning in mind, such as repetition and distributed practice. Furthermore, our paradigm is consistent with the goal of task-specific training, whereby participants practiced a functional task that simulated the basic activity of daily living of feeding oneself (19,20). To ensure the task was not overlearned, the non-stroke cohort used their nondominant hand; individuals in the stroke cohort used their more-affected hand. Given that all participants regardless of group were right-hand dominant, the non-stroke group performed all assessments and training with their left hand while most individuals in the stroke group did so with their right hand (one participant experienced left hemiplegia and used this hand accordingly).

The motor task used an experimental apparatus consisting of a wooden board (43 x 61 cm) with three different target cups placed radially around a constant 'home' cup at a distance of 16 cm (Fig. 2); each cup was 9.5 cm in diameter and 5.8 cm in height. Each trial began with thirty raw kidney beans in the home cup. The participant was instructed to pick up a standard

plastic spoon located on the ipsilateral side of the home cup and use it to scoop two beans at a time from the home cup to the following sequence of target cups: ipsilateral, middle, then contralateral. This sequence was repeated until the last pair of beans were placed in the contralateral target cup, completing the trial. Errors such as transporting the wrong number of beans, dropping beans, or reaching in the wrong direction were recorded; error rates for both groups were modest (11.4% and 9.5% for stroke and non-stroke, respectively) and not included in our analyses. Participants were timed and instructed to move as quickly and as accurately as possible while freely exploring postural techniques to enhance performance (i.e., discovery learning). Trial time began when the participant picked up the spoon, with lower trial times indicating better performance. Since each trial consisted of 15 reaching movements, participants complete 750 reaches per training session, totaling 2,250 across the entire training paradigm. This task has ecological and construct validity (21) and instructional videos are available on Open Science Framework.

### *Statistical Analysis*

Analyses were performed in JMP Pro 14.0 (SAS) and R Core Team 4.0.0 (2020) statistical software. To model the extent to which visuospatial memory test scores predicted one-month skill learning in a non-stroke cohort, multivariable regression was performed using covariates of age, education, Delayed Recall score, and baseline motor performance. Education was included to serve as a proxy for cognitive reserve (i.e., the brain's resilience to neuropathological damage), which may explain differences in cognitive factors such as executive function, working memory, global cognition, and general arousal, as well as motor function following stroke (22). A separate model was then generated that excluded Delayed Recall scores to measure prediction accuracy without these visuospatial test scores, also in the non-stroke



cohort. Analysis of variance (ANOVA) was then used to statistically compare prediction accuracy between both models. To test the robustness of this relationship, we performed two separate analyses: both models (Delayed Recall vs. no Delayed Recall) were 1) cross-validated in the non-stroke cohort using a leave-one-out approach (23) and 2) ‘trained’ using data from the non-stroke cohort and ‘tested’ on the independent stroke dataset. In leave-one-out cross-validation, the model is trained on all data except that of a single participant and a prediction is made for that participant’s data; this process repeats for every participant (i.e., 47 times), thus all data are used for training the model but are used for prediction only once. This approach was chosen because it provides a method of generating unbiased prediction error to better estimate model fit. The mean squared error (MSE) between predicted versus observed values was calculated to compare accuracy among predictive models. This approach was designed to evaluate the extent to which visuospatial memory test scores can improve the prediction of long-term motor learning (i.e., comparison of MSE between Delayed Recall and no Delayed Recall models) and if this relationship generalizes to individuals with a history of stroke (i.e., comparison of MSE between non-stroke and stroke datasets).

The proposed approach has several strengths regarding rigor and reproducibility. First, by validating our model using data from our previous experiment (i.e., from a non-stroke cohort), bias is minimized. Second, by testing this validated model on an independent stroke dataset, the generalizability of this previously identified relationship can be examined within an independent clinical sample while minimizing the likelihood of statistical issues that are common in small sample sizes (e.g., a lack of statistical power, etc. (24)).

## Results

Participant characteristics, sensory and motor data are presented in Table 1. Overall, participants with a history of ischemic stroke had mild motor impairment, as indicated by their Upper Extremity Fugl-Meyer scores and their Action Research Arm Test scores. We acknowledge that the group had minimal motor deficits based on these stroke-specific assessments, but we point out, however, that participants with a history of ischemic stroke performed worse on the Grooved Pegboard Test than the non-stroke group (# drops,  $p=0.014$ ; time to complete,  $p=0.093$ ) even when performing it with their affected dominant (right) hand while the non-stroke group performed it with their nondominant (left) hand. Furthermore, the stroke group's baseline performance on the motor task was worse than the non-stroke group's performance with the same (right) hand ( $p=0.059$ ). Collectively, these data indicate that the stroke group did in fact have some degree of motor impairment.

Motor training and retention data for participants with a history of stroke are presented in Figure 3 (it is noted that these data for non-stroke cohort have been published previously (13)). On average, participants improved performance from the baseline trial (mean $\pm$ SD=53.09 $\pm$ 11.31 seconds; 95% CI [44.72, 61.46]) to one-month follow-up (mean $\pm$ SD=49.01 $\pm$ 11.46 seconds; 95% CI [40.52, 57.50]), indicating that some participants improved more than others.

To model the extent to which visuospatial memory predicted motor performance at one-month follow-up in the non-stroke cohort, multivariable regression included covariates of age, education, Delayed Recall score, and baseline motor performance (Table 2). Delayed Recall scores ( $p=0.025$ ,  $\beta=-0.31$ ; 95% CI [15.87, 16.38]) and baseline motor performance ( $p=0.002$ ,  $\beta=0.31$ ; 95% CI [58.12, 58.48]) demonstrated a similar effect size with one-month follow-up performance, where better scores predicted better performance at one-month follow-up. Age ( $p=0.22$ ,  $\beta=0.19$ ; 95% CI [-69.38, 70.01]) and education ( $p=0.67$ ,  $\beta=0.13$ ; 95% CI [-5.00,

16.98]) did not predict follow-up. In the comparison model that excluded Delayed Recall scores, only baseline performance ( $p < 0.0001$ ,  $\eta^2 = 0.36$ ) predicted one-month follow-up performance (Table 3). ANOVA confirmed a significant difference between both models ( $p < 0.05$ , Akaike information criterion of 305.4 vs. 308.4, respectively), indicating that the inclusion of Delayed Recall test scores explained more variance in motor performance at one-month follow-up than baseline, age and education alone, and improved the model's overall goodness-of-fit.

To test the robustness of this relationship, both models (Delayed Recall vs. no Delayed Recall) were validated in the non-stroke cohort using a leave-one-out cross-validation approach. The mean squared error (MSE) between predicted and observed values for each model was 36.29 and 39.11 seconds, respectively (Fig. 4A). To test the generalizability of each model, both linear models (Delayed Recall vs. no Delayed Recall) were trained and then tested on the independent stroke dataset. The MSE between predicted and observed values for each model was 74.85 and 77.77 seconds, respectively (Fig. 4B). Overall, inclusion of Delayed Recall test scores reduced MSE, albeit modestly, in both models of one-month skill learning in non-stroke and stroke samples. However, these results from individual predictors are still of interest, given that the null model shows that group-based prediction performed much worse than individual-specific models. The resulting MSE was 87.24 seconds and 112.61 seconds for non-stroke and stroke groups, respectively.

## Discussion

The purpose of this short report was to determine the generalizability of the Rey-Osterrieth Complex Figure Delayed Recall test as a predictor of motor learning in a post-stroke cohort based on our previous findings, and to evaluate the extent to which adding these test scores as a predictor variable improved prediction accuracy. To address these hypothesis-driven

questions, we trained two regression models (with and without Delayed Recall) using non-stroke data and tested them using leave-one-out cross-validation as well as on an independent stroke dataset using linear regression. Consistent with our hypothesis, results indicated that inclusion of Delayed Recall scores explained more variance in motor performance at one-month follow-up as compared to models that just included age, education, and baseline motor performance. This was consistent across both stroke and non-stroke datasets. These findings support the concept that visuospatial memory testing may provide prognostic insight into motor rehabilitation outcomes, and that cognitive rehabilitation could play a significant role in priming successful motor rehabilitation outcomes.

Despite the putative association between visuospatial memory and motor learning, cognitive variables are not currently considered in predictive models of upper-extremity motor recovery. This could be due to conflicting reports from clinical studies that evaluated the relationship between cognitive testing and motor rehabilitation outcomes. For example, change in motor outcomes has been linked to memory (25), executive (26), and visuospatial (27) functions, while other studies report no relationship between these cognitive domains and motor improvement (28). Comparison between reports is further confounded by differences in severity of impairment between groups, and more importantly, the lack of specificity in the cognitive tasks used. Often times global measures like the Montreal Cognitive Assessment or the Mini-Mental Status Exam are used to quantify cognition, but these tests insufficiently measure the function of specific cognitive domains especially pertinent to motor learning abilities and are often used as exclusion criteria (24).

A plausible mechanism underlying the association between visuospatial and motor learning is variation in structural integrity of specific white matter tracts among older adults and

individuals with stroke. Structural neuroimaging studies in healthy aging (29) and stroke (30) demonstrate that white matter is particularly susceptible to the degenerative effects of normal aging and lesions. While the structural characteristics of frontoparietal white matter tracts have been linked to visuospatial function (31) and motor skill learning (32), it remains unknown if frontoparietal white matter microstructure explains variance in this behavioral relationship. Notably, the non-stroke group in this study used their left hand to complete the motor training, while the stroke group used their more affected hand. The fact that we observed a behavioral relationship between delayed visuospatial memory and one-month skill retention independent of which hand was used suggests that this effect is generalizable.

As with neural structures, motor learning and visuospatial function typically decline across the lifespan (33–37), yet one unexpected finding from the present study was that age did not demonstrate a significant effect on one-month follow-up performance. As a quality check, only participant age was included in the regression models of one-month follow-up, and results indicated that indeed age was related to follow-up performance (results not reported); we interpret this to suggest that behavioral factors such as baseline motor performance and delayed visuospatial memory are more sensitive predictors of one-month motor performance than chronological age (i.e., which explains why age is nonsignificant when these variables are included in the models). Moreover, our results indicate that visuospatial memory may explain variance beyond that of age, education, and baseline performance alone.

In regard to predicting spontaneous stroke recovery, this and other studies do not suggest that visuospatial memory scores can or should replace predictor variables used in current algorithms, or that the models presented here are valid recovery prediction tools; rather, the purpose of this short report was to demonstrate the predictive relationship between visuospatial

memory and motor learning persists in individuals with a history of stroke, and to empirically support the premise that visuospatial memory testing may be an overlooked consideration for understanding why responsiveness to motor rehabilitation can be so varied.

Previous research has shown that effect sizes and beta values derived from a small sample group are highly prone to inflation and therefore may be unreliable (24). To avoid this pitfall in our analyses, we first evaluated the reliability of the behavioral relationship in a moderately large non-stroke group using leave-one-out cross validation; results indicated beta values in this dataset were reliable. This validated model was then used to test if the behavioral relationship also generalizes to individuals with a history of stroke. In other words, while the stroke cohort in this study was small, our analyses were not wholly dependent upon its sample size and the potential limitations associated with it. Another limitation to this study is that all participants were in the chronic stage of stroke (>1 year) and exhibited very mild motor impairment. It is possible that individuals with more moderate-to-severe motor impairment (had we been able to recruit them prior to the COVID-19 shutdown) would have also had more impaired visuospatial ability (38), which would support previous findings of less motor learning with higher stroke severity (39) based on our working hypothesis and regression model. However, as noted above, a larger, more acute, and more impaired sample has not been recruited due to COVID-19, preventing us from directly testing whether this model would retain comparable prediction accuracy in more acute or more impaired individuals. This is not a trivial question, since different cognitive deficits tend to emerge throughout the recovery process (e.g., attention deficits during acute (40) and visuospatial and memory deficits present at three months post-stroke (41)). Thus, the current study cannot discern if the presence of other cognitive impairments will impact this behavioral relationship. However, since the Rey-Osterrieth

Complex Figure Delayed Recall test is a validated measure of nonverbal memory, executive function, and graphomotor skills, it likely captures the breadth of cognitive impairments most common following stroke. To address these limitations, future work will involve recruiting a larger and more impaired sample and evaluating if Delayed Recall scores, and other specific neuropsychological tests, can be used to improve prediction in models involving individuals with stroke during the acute stage.

### *Conclusions*

In summary, the inclusion of Delayed Recall test scores modestly improved the accuracy in predictive models of one-month skill learning in individuals with and without stroke. These findings support the concept that visuospatial memory testing may provide prognostic insight into upper extremity motor learning and encourage future work to examine the role of cognitive testing in predictive models of motor recovery.

### **Declarations**

#### *Ethics approval and consent to participate*

The participant recruitment and experimental protocols for this study was approved by Arizona State University's Institutional Review Board. All protocols aligned with the Declaration of Helsinki and participants provided informed consent prior study enrollment.

#### *Consent for publication*

Not applicable.

#### *Availability of data and materials*

The datasets used and/or analyzed during the current study are available from the corresponding author on reasonable request.

### *Competing interests*

The authors declare that they have no competing interests.

### *Funding*

This work was supported in part by the National Institute on Aging at the National Institutes of Health (K01AG047926 and R03AG056822 to SYS, and F31AG062057 to JLV), including the study design, data collection, analysis, and interpretation, and manuscript preparation. The content is solely the responsibility of the authors and does not necessarily represent the official views of the National Institutes of Health.

### *Authors' contributions*

JLV conceptualized the project, analyzed and interpreted data, and wrote the original draft. AH analyzed and interpreted the data and read and approved the final manuscript. PRB assisted in participant recruitment and clinical assessment. SYS supported the project, interpreted data and reviewed and edited the final draft. All authors read and approved the final manuscript.

## **References**

1. Bastian AJ. Understanding sensorimotor adaptation and learning for rehabilitation. *Curr Opin Neurol.* 2008;21(6):628–33.
2. Stinear C. Prediction of recovery of motor function after stroke. *Lancet Neurol.* 2010 Dec;9(12):1228–32.



3. Tozlu C, Edwards D, Boes A, Labar D, Tsagaris KZ, Silverstein J, et al. Machine Learning Methods Predict Individual Upper-Limb Motor Impairment Following Therapy in Chronic Stroke. *Neurorehabil Neural Repair* [Internet]. 2020 Mar 20;34(5):428–39. Available from: <https://doi.org/10.1177/1545968320909796>
4. Lipp I, Foster C, Stickland R, Sgarlata E, Tallantyre EC, Davidson AE, et al. Predictors of training-related improvement in visuomotor performance in patients with multiple sclerosis: A behavioural and MRI study. *Mult Scler J* [Internet]. 2020 Aug 4;1352458520943788. Available from: <https://doi.org/10.1177/1352458520943788>
5. Lingo VanGilder J, Hooyman A, Peterson DS, Schaefer SY. Post-Stroke Cognitive Impairments and Responsiveness to Motor Rehabilitation: A Review. *Curr Phys Med Rehabil Reports* [Internet]. 2020; Available from: <https://doi.org/10.1007/s40141-020-00283-3>
6. Schaefer SY, Sullivan JM, Peterson DS, Fauth EB. Cognitive function at admission predicts amount of gait speed change in geriatric physical rehabilitation. Vol. 63, *Annals of physical and rehabilitation medicine*. 2020. p. 359–61.
7. Dobkin BHK, Nadeau SE, Behrman AL, Wu SS, Rose DK, Bowden M, et al. Prediction of responders for outcome measures of locomotor Experience Applied Post Stroke trial. *J Rehabil Res Dev* [Internet]. 2014;51(1):39–50. Available from: <https://www.ncbi.nlm.nih.gov/pubmed/24805892>
8. Fleishman EA, Rich S. Role of kinesthetic and spatial-visual abilities in perceptual-motor learning. *J Exp Psychol*. 1963;66(1):6–11.
9. Wang P, Infurna FJ, Schaefer SY. Predicting Motor Skill Learning in Older Adults Using

- Visuospatial Performance. *J Mot Learn Dev* [Internet]. 2019;1–14. Available from:  
<https://journals.humankinetics.com/view/journals/jmld/aop/article-10.1123-jmld.2018-0017.xml>
10. Bo J, Borza V, Seidler RD. Age-related declines in visuospatial working memory correlate with deficits in explicit motor sequence learning. *J Neurophysiol* [Internet]. 2009;102(September 2009):2744–54. Available from:  
<http://jn.physiology.org/cgi/content/abstract/00393.2009v1%5Cnhttp://www.pubmedcentral.nih.gov/articlerender.fcgi?artid=2777814&tool=pmcentrez&rendertype=abstract>
11. Langan J, Seidler RD. Age differences in spatial working memory contributions to visuomotor adaptation and transfer. *Behav Brain Res* [Internet]. 2011/07/20. 2011 Nov 20;225(1):160–8. Available from: <https://www.ncbi.nlm.nih.gov/pubmed/21784106>
12. Jeunet C, Jahanpour E, Lotte F. Why standard brain-computer interface (BCI) training protocols should be changed: An experimental study. *J Neural Eng*. 2016;13(3):36024.
13. Lingo VanGilder J, Lohse KR, Duff K, Wang P, Schaefer SY. Evidence for associations between Rey-Osterrieth Complex Figure test and motor skill learning in older adults. *bioRxiv* [Internet]. 2020 Jan 1;2020.09.27.315168. Available from:  
<http://biorxiv.org/content/early/2020/09/28/2020.09.27.315168.abstract>
14. Lingo VanGilder J, Hengge CR, Duff K, Schaefer SY. Visuospatial function predicts one-week motor skill retention in cognitively intact older adults. *Neurosci Lett* [Internet]. 2018;664:139–43. Available from:  
<https://www.sciencedirect.com/science/article/pii/S0304394017309412>
15. Lingo VanGilder J, Walter CS, Hengge CR, Schaefer SY. Exploring the relationship

- between visuospatial function and age-related deficits in motor skill transfer. *Aging Clin Exp Res*. 2019 Sep;
16. Benton AL, Abigail B, Sivan AB, Hamsher K deS, Varney NR, Spreen O. Contributions to neuropsychological assessment: A clinical manual. Oxford University Press, USA; 1994.
  17. Wechsler D. Manual for the Wechsler Adult Intelligence Scale. Manual for the Wechsler Adult Intelligence Scale. Oxford, England: Psychological Corp.; 1955. vi, 110–vi, 110.
  18. Osterrieth PA. Le test de copie d'une figure complexe [in French]. *Arch Psychol* (Geneve). 1944;30(30):206–356.
  19. Katz S, Downs TD, Cash HR, Grotz RC. Progress in development of the Index of ADL1. *Gerontologist*. 1970 Mar 1;10(1\_Part\_1):20–30.
  20. Jebsen RH, Taylor N, Trieschmann RB, Trotter MJ, Howard LA. An objective and standardized test of hand function. *Arch Phys Med Rehabil*. 1969 Jun;50(6):311–9.
  21. Schaefer SY, Hengge CR. Testing the concurrent validity of a naturalistic upper extremity reaching task. *Exp Brain Res*. 2016;234(1):229–40.
  22. Umarova RM, Sperber C, Kaller CP, Schmidt CSM, Urbach H, Kloppel S, et al. Cognitive reserve impacts on disability and cognitive deficits in acute stroke. *J Neurol*. 2019 Oct;266(10):2495–504.
  23. Shao J. Linear Model Selection by Cross-validation. *J Am Stat Assoc* [Internet]. 1993 Jun 1;88(422):486–94. Available from: <https://amstat.tandfonline.com/doi/abs/10.1080/01621459.1993.10476299>

24. Lohse K, Buchanan T, Miller M. Underpowered and Overworked: Problems With Data Analysis in Motor Learning Studies. *J Mot Learn Dev* [Internet]. 2016;4(1):37–58. Available from: <https://journals.humankinetics.com/view/journals/jmld/4/1/article-p37.xml>
25. Cirstea CM, Ptito A, Levin MF. Feedback and cognition in arm motor skill reacquisition after stroke. *Stroke*. 2006 May;37(5):1237–42.
26. Dancause N, Ptito A, Levin MF. Error correction strategies for motor behavior after unilateral brain damage: short-term motor learning processes. *Neuropsychologia*. 2002;40(8):1313–23.
27. Toggia J, Fitzgerald KA, O'Dell MW, Mastrogiovanni AR, Lin CD. The Mini-Mental State Examination and Montreal Cognitive Assessment in persons with Mild Subacute Stroke: Relationship to functional outcome. *Arch Phys Med Rehabil*. 2011;92(5):792–8.
28. Boe EW, Pedersen AD, Pedersen AR, Nielsen JF, Blicher JU. Cognitive status does not predict motor gain from post stroke constraint-induced movement therapy. *NeuroRehabilitation*. 2014;34(1):201–7.
29. Ge Y, Grossman RI, Babb JS, Rabin ML, Mannon LJ, Kolson DL. Age-related total gray matter and white matter changes in normal adult brain. Part I: Volumetric MR imaging analysis. *AJNR Am J Neuroradiol*. 2002;23(8):1327–33.
30. Wang Y, Liu G, Hong D, Chen F, Ji X, Cao G. White matter injury in ischemic stroke. *Prog Neurobiol* [Internet]. 2016;141:45–60. Available from: <http://www.sciencedirect.com/science/article/pii/S0301008216300016>

31. Budisavljevic S, Dell'Acqua F, Zanatto D, Begliomini C, Miotto D, Motta R, et al. Asymmetry and Structure of the Fronto-Parietal Networks Underlie Visuomotor Processing in Humans. *Cereb Cortex*. 2017;27(2):1532–44.
32. Steele CJ, Scholz J, Douaud G, Johansen-Berg H, Penhune VB. Structural correlates of skilled performance on a motor sequence task. *Front Hum Neurosci* [Internet]. 2012;6(October):1–9. Available from: <http://journal.frontiersin.org/article/10.3389/fnhum.2012.00289/abstract>
33. Bendayan R, Piccinin AM, Hofer SM, Cadar D, Johansson B, Muniz-Terrera G. Decline in Memory, Visuospatial Ability, and Crystallized Cognitive Abilities in Older Adults: Normative Aging or Terminal Decline? *J Aging Res*. 2017;2017.
34. Grady CL, Maisog JM, Horwitz B, Ungerleider LG, Mentis MJ, Salerno JA, et al. Age-related changes in cortical blood flow activation during visual processing of faces and location. *J Neurosci*. 1994;14(3 Pt 2):1450.
35. Muniz-Terrera G, Massa F, Benaglia T, Johansson B, Piccinin A, Robitaille A. Visuospatial Reasoning Trajectories and Death in a Study of the Oldest Old: A Formal Evaluation of Their Association. *J Aging Health*. 2019 Jun;31(5):743–59.
36. Walter CS, Hengge CR, Lindauer BE, Schaefer SY. Declines in motor transfer following upper extremity task-specific training in older adults. *Exp Gerontol*. 2019;116:14–9.
37. Shea C, Jin-Hoon P. Age-Related Effects in Sequential Motor Learning. *Phys Ther*. 2006;86(4):478–88.
38. Kalra L, Perez I, Gupta S, Wittink M. The influence of visual neglect on stroke

- rehabilitation. *Stroke*. 1997 Jul;28(7):1386–91.
39. Boyd LA, Quaney BM, Pohl PS, Winstein CJ. Learning Implicitly: Effects of Task and Severity After Stroke. *Neurorehabil Neural Repair* [Internet]. 2007 Mar 16;21(5):444–54. Available from: <https://doi.org/10.1177/1545968307300438>
40. Al-Qazzaz NK, Ali SH, Ahmad SA, Islam S, Mohamad K. Cognitive impairment and memory dysfunction after a stroke diagnosis: a post-stroke memory assessment. *Neuropsychiatr Dis Treat*. 2014;10:1677–91.
41. Jokinen H, Melkas S, Ylikoski R, Pohjasvaara T, Kaste M, Erkinjuntti T, et al. Post-stroke cognitive impairment is common even after successful clinical recovery. *Eur J Neurol*. 2015 Sep;22(9):1288–94.

Table 1. Participant characteristics.

|                                         | <i>Control (nonstroke)</i> | <i>Stroke</i>              |
|-----------------------------------------|----------------------------|----------------------------|
| Age <sup>a</sup>                        | 69.7±6.5<br>(56-87)        | 58.4±16.5<br>(33-81)       |
| Education <sup>b</sup>                  | 16.3±2.7<br>(12-24)        | 15.9±2.0<br>(14-19)        |
| Sex                                     | 29 female<br>18 male       | 3 female<br>4 male         |
| Grip strength <sup>c</sup>              | 29.1±11.1<br>(9.3-51.7)    | 29.6±14.4<br>(11-56)       |
| Grooved Pegboard Test <sup>d</sup>      | 104.6±49.6<br>(64.6-335.6) | 138.7±48.8<br>(50.2-200.5) |
| Rey-Osterrieth Delayed Recall           | 16.1±6.7<br>(2-31.5)       | 12.3±8.3<br>(5-25)         |
| Time post-stroke <sup>e</sup>           |                            | 3.8 ± 2.8<br>(1.1-9.7)     |
| Upper extremity Fugl-Meyer <sup>f</sup> |                            | 63 ± 3.5<br>(58-66)        |
| Action Research Arm Test <sup>g</sup>   |                            | 52.7 ± 6.9<br>(38-57)      |
| Modified Ashworth Scale <sup>h</sup>    |                            | 0.7 ± 1.1<br>(0-3)         |

<sup>a</sup>in years; <sup>b</sup>in years; <sup>c</sup>in kilograms (dominant hand); <sup>d</sup>time, in seconds; <sup>e</sup>in years; <sup>f</sup>out of 66; <sup>g</sup>out of 57; <sup>h</sup>scale of 0-4, measuring elbow flexors

Table 2. Parameters from the least-squares regression model including Delayed Recall that explain one-month follow-up performance.

---

Based on 47 observations.

---

Parameter Estimates

---

| <i>Name</i>    | <i>Estimate (<math>\beta</math>)</i> | <i>SE</i> | <i>df</i> | <i>t-value</i> | <i>p-value</i> |
|----------------|--------------------------------------|-----------|-----------|----------------|----------------|
| Intercept      | 19.47                                | 12.39     | 0         | 1.57           | 0.124          |
| Delayed Recall | -0.31                                | 0.13      | 1         | -2.33          | 0.025*         |
| Age            | 0.19                                 | 0.16      | 1         | 1.24           | 0.222          |
| Education      | 0.13                                 | 0.34      | 1         | 0.43           | 0.673          |
| Baseline       | 0.31                                 | 0.09      | 1         | 3.35           | 0.002*         |

---

*Note.*

.



Table 3. Parameters from the least-squares regression model excluding Delayed Recall that explain one-month follow-up performance.

| Based on 47 observations. |                                      |           |           |                |                |
|---------------------------|--------------------------------------|-----------|-----------|----------------|----------------|
| Parameter Estimates       |                                      |           |           |                |                |
| <i>Name</i>               | <i>Estimate (<math>\beta</math>)</i> | <i>SE</i> | <i>df</i> | <i>t-value</i> | <i>p-value</i> |
| Intercept                 | 15.57                                | 12.89     | 0         | 1.21           | 0.234          |
| Age                       | 0.19                                 | 0.16      | 1         | 1.14           | 0.260          |
| Education                 | -0.07                                | 0.34      | 1         | -0.20          | 0.842          |
| Baseline                  | 0.36                                 | 0.10      | 1         | 3.76           | <0.000*        |
| <i>Note.</i>              |                                      |           |           |                |                |

.

# Figure Captions

Figure 1. Participants completed the Rey-Osterrieth Complex Figure Copy (measures visual construction; on the top row) and Delayed Recall (measures visuospatial memory; on the bottom row); only the Delayed Recall trial was analyzed in this study. The Copy and Delayed Recall trials are scored independently from each other. Panels A and B show example drawings from older adults and individuals with a history of stroke, respectively. Note both groups demonstrated high performance on the Copy trial but marked variability in Delayed Recall performance.

Figure 2. Participants used their nondominant hand to perform the motor task that mimicked the upper extremity movements required to feed oneself. This image is adapted from the “Dexterity and Reaching Motor Tasks” by MRL Laboratory that is licensed under CC BY 2.0.

Figure 3. Participants completed a baseline trial of the reaching motor task, then completed 50 training trials during three weekly sessions (150 trials total). Participants were retested one month later to determine skill learning; four participants did not complete the third training session (trials 101-150) but did return for the one-month follow-up. Mean motor performance (trial time in seconds) is plotted on the y-axis, where lower values indicate better performance. Error bars indicate standard error.

Figure 4. The mean squared error (MSE) for each model is presented for older adults and individuals with a history of stroke. A) Each model (Delayed Recall, no Delayed Recall, Null) was trained and tested on older adult data using a leave-one-out cross-validation approach; B) Each model was trained on older adult data and tested on individuals with stroke using a linear

regression approach. Results indicate that in both groups, the inclusion of Delayed Recall test scores improved MSE.

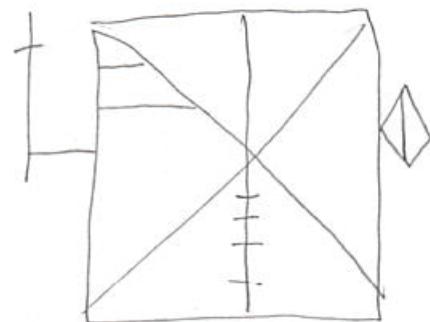

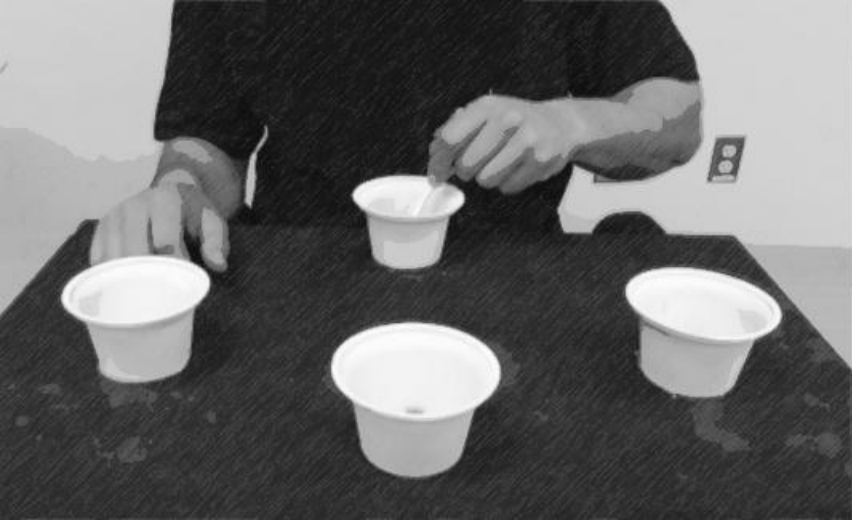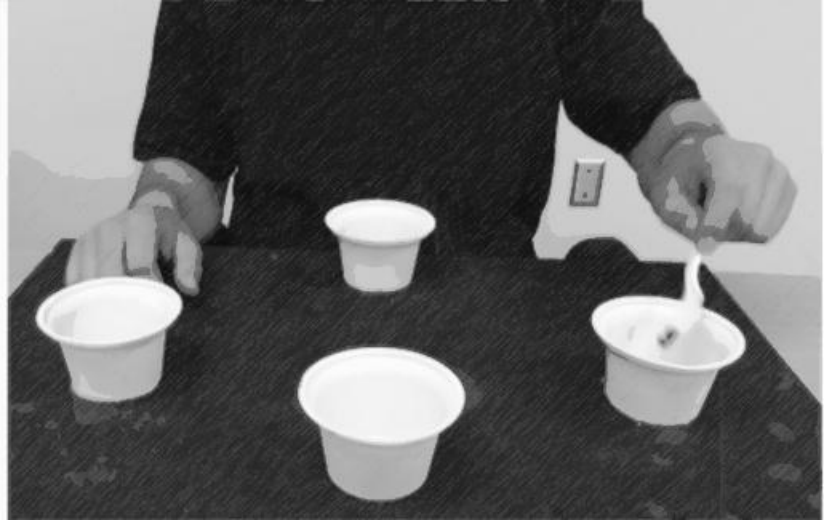

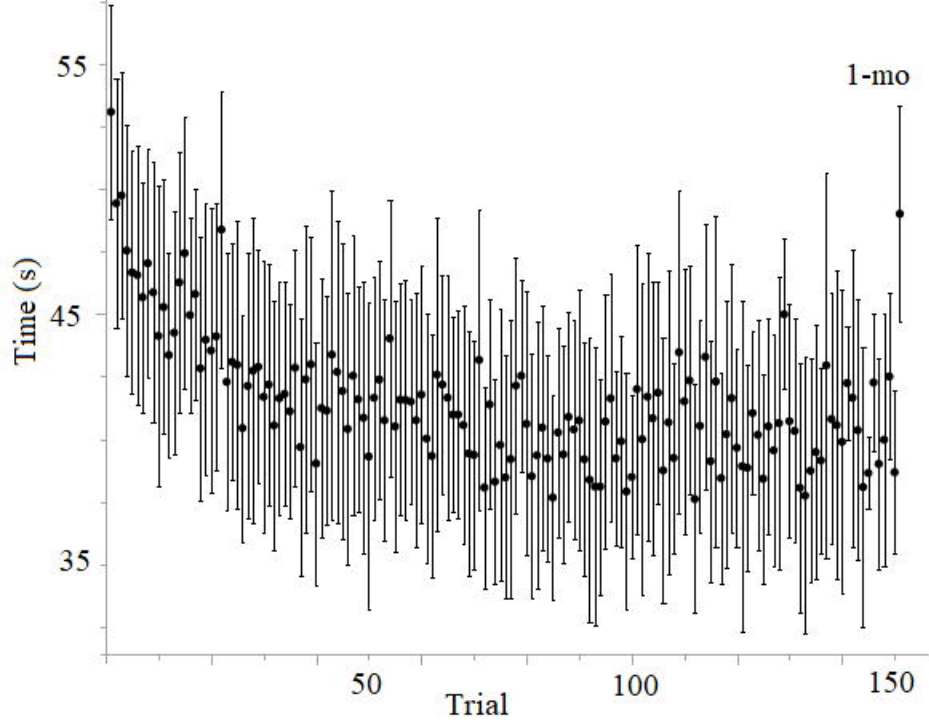

A

B

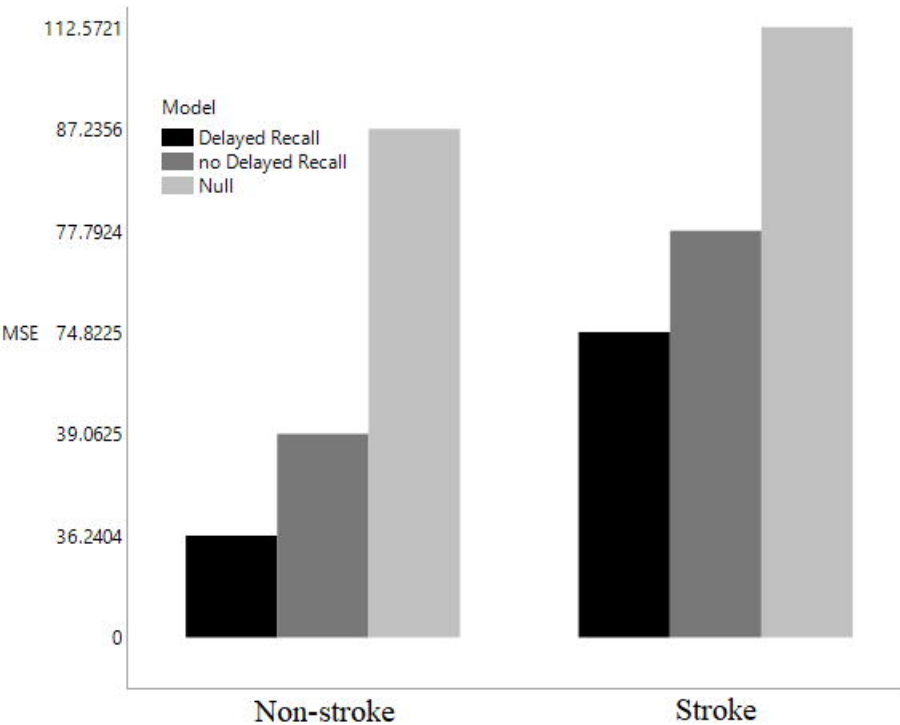

Source: https://www.biorxiv.org/content/10.1101/2020.10.14.330357v1.full.pdf
